# Supplementary material for: Cytochalasin Z11 inhibits RANKL-induced osteoclastogenesis via suppressing NFATc1 activation
Source: Royal Society of Chemistry journal article supplement (doi:10.1039/c9ra07240c), 2019-01-01
Supplement: c9ra07240c1.pdf [file c9ra07240c1.pdf]

Supplementary Information

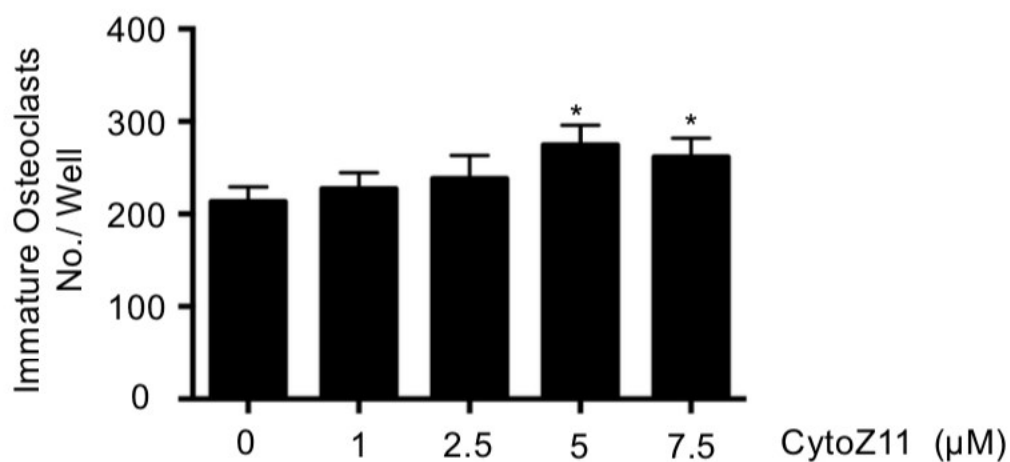

Figure S1

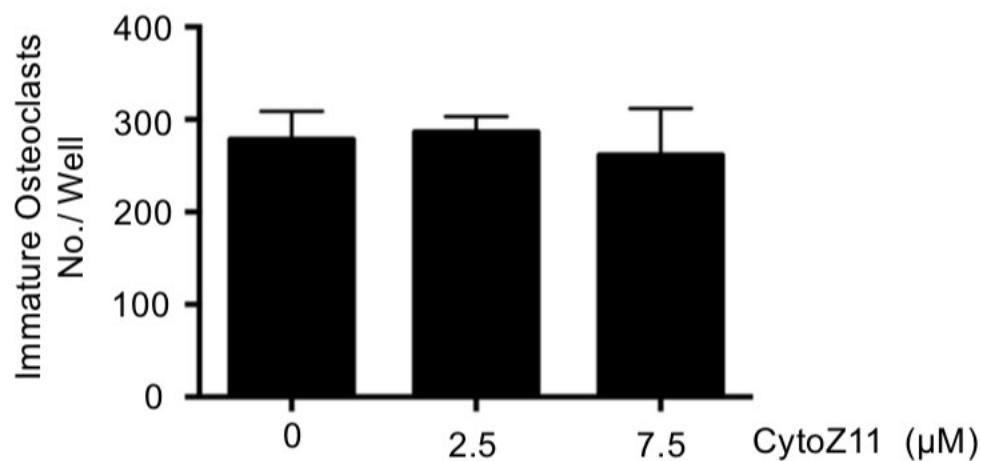

Figure S2

**FIGURE S1 and S2.** The quantification of immature osteoclasts (nuclei  $\leq 3$ ) in **(S1)** osteoclastogenesis assay and **(S2)** bone resorption assay. \* $p < 0.05$ , relative to RANKL-induced control group.
